# Supplementary material for: Ассоциативный эксперимент как метод изучения корпоративной культуры юристов
Source: HighWire-hosted journal article supplement (doi:10.1136/emermed-2013-203203), 2011-01-01
Supplement: emermed-2013-203203supp_appendixA.pdf [file emermed-2013-203203supp_appendixA.pdf]

## **Human Factors Faculty**

### **Focus Groups Topic Guide**

Explain purpose of FG (not evaluation of course)

*Thinking ahead .....*

What do you think you're going to try in your own workplace ?

How might you go about that ?

How do you think your colleagues (of all professions/grades) will react to this approach ?

What difficulties do you anticipate ?

How do you think you might overcome them ?

Any wider thoughts about implementation ?

Any other points
