# Supplementary material for: Ассоциативный эксперимент как метод изучения корпоративной культуры юристов
Source: HighWire-hosted journal article supplement (doi:10.1136/emermed-2013-203203), 2011-01-01
Supplement: emermed-2013-203203supp_appendixB.pdf [file emermed-2013-203203supp_appendixB.pdf]

## **Human Factors in Clinical Practice**

### **Interview Schedule (faculty and participants)**

Introduction, explanation of project, check consent

What were their expectations of the course before they came ?

What did they think about the course and what they got ?

Was there anything that was surprising or different ?

What were the ideas that were discussed that they thought they wanted to do something about/take forward ? Why those ?

Have they tried to do anything in practice as a result of the course ? (might need to probe a bit here – could be something quite small, or that interviewees have overlooked)

If not, what were the barriers ?

Any changes in their thinking about their work ?

Is the human factors work part of their professional work ? or is it something more managerial ? why ?

Do they think they are perceived differently by colleagues as a result of the course ?

Anything they would like to add ?

Thanks. Close
